# Supplementary material
Source: Springer Nature journal article supplement (https://www.springermedizin.de/resource/supplementary/12865_2009_264_MOESM4_ESM.pdf/9427630)

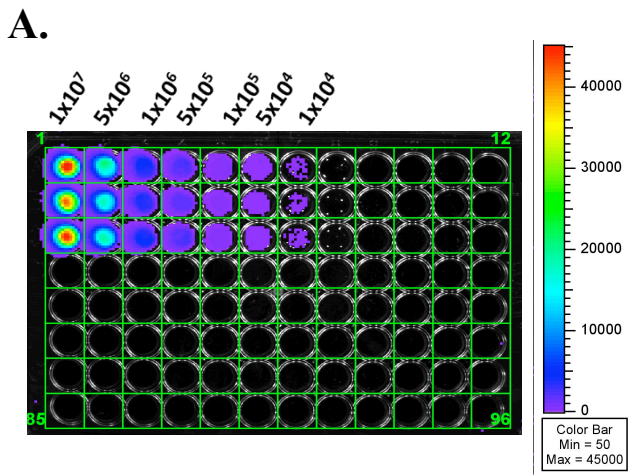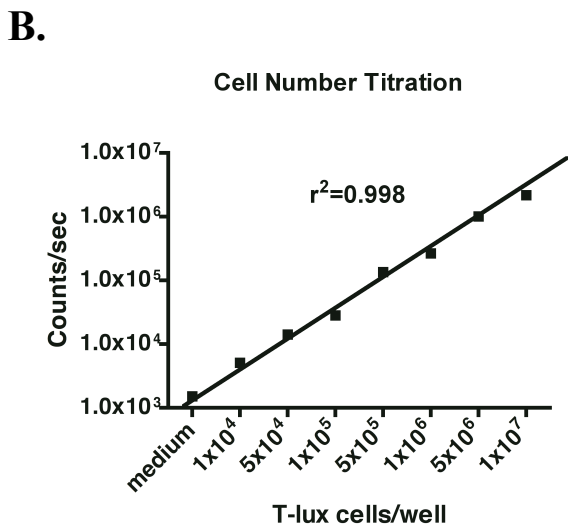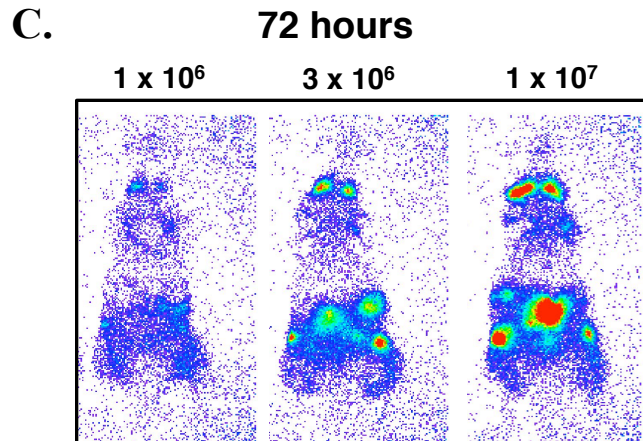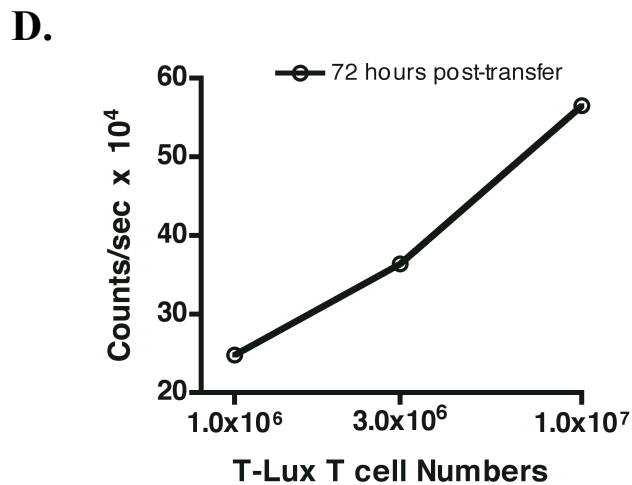

Supplement: MOESM4 [file 9427630]
